# Supplementary figures and images for: Altered Calcium Influx Pathways in Cancer-Associated Fibroblasts
Source: MDPI journal article supplement (doi:10.3390/biomedicines9060680), 2021-06-16

Additional File 2: Fig. S1. Sadras et al.

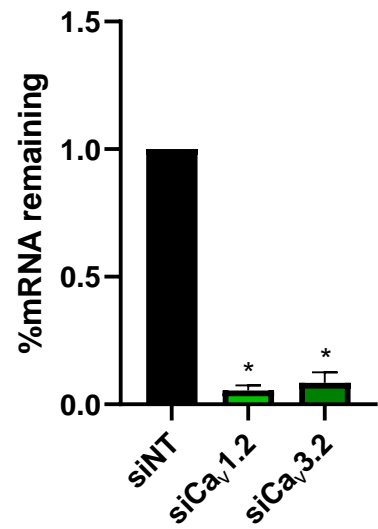

Supplement: s1 [file s1]
